# Supplementary material for: Estimating the global and regional burden of meningitis in children caused by Haemophilus influenzae type b: A systematic review and meta-analysis
Source: PubMed Central journal article supplement (PMC8893283; doi:10.7189/jogh.12.04014), 2022-03-05
Supplement: jogh-12-04014-s001.pdf [file jogh-12-04014-s001.pdf]

**Table S1: PRISMA 2020 Checklist**

| Section and Topic             | Item # | Checklist item                                                                                                                                                                                                                                                                                       | Location where item is reported |
|-------------------------------|--------|------------------------------------------------------------------------------------------------------------------------------------------------------------------------------------------------------------------------------------------------------------------------------------------------------|---------------------------------|
| <b>TITLE</b>                  |        |                                                                                                                                                                                                                                                                                                      |                                 |
| Title                         | 1      | Identify the report as a systematic review.                                                                                                                                                                                                                                                          | Pg 0                            |
| <b>ABSTRACT</b>               |        |                                                                                                                                                                                                                                                                                                      |                                 |
| Abstract                      | 2      | See the PRISMA 2020 for Abstracts checklist.                                                                                                                                                                                                                                                         | Pg 1                            |
| <b>INTRODUCTION</b>           |        |                                                                                                                                                                                                                                                                                                      |                                 |
| Rationale                     | 3      | Describe the rationale for the review in the context of existing knowledge.                                                                                                                                                                                                                          | Pg 1                            |
| Objectives                    | 4      | Provide an explicit statement of the objective(s) or question(s) the review addresses.                                                                                                                                                                                                               | Pg 1                            |
| <b>METHODS</b>                |        |                                                                                                                                                                                                                                                                                                      |                                 |
| Eligibility criteria          | 5      | Specify the inclusion and exclusion criteria for the review and how studies were grouped for the syntheses.                                                                                                                                                                                          | Pg 2                            |
| Information sources           | 6      | Specify all databases, registers, websites, organisations, reference lists and other sources searched or consulted to identify studies. Specify the date when each source was last searched or consulted.                                                                                            | Pg 2                            |
| Search strategy               | 7      | Present the full search strategies for all databases, registers and websites, including any filters and limits used.                                                                                                                                                                                 | Pg 2                            |
| Selection process             | 8      | Specify the methods used to decide whether a study met the inclusion criteria of the review, including how many reviewers screened each record and each report retrieved, whether they worked independently, and if applicable, details of automation tools used in the process.                     | Pg 2-3                          |
| Data collection process       | 9      | Specify the methods used to collect data from reports, including how many reviewers collected data from each report, whether they worked independently, any processes for obtaining or confirming data from study investigators, and if applicable, details of automation tools used in the process. | Pg 2-3                          |
| Data items                    | 10a    | List and define all outcomes for which data were sought. Specify whether all results that were compatible with each outcome domain in each study were sought (e.g. for all measures, time points, analyses), and if not, the methods used to decide which results to collect.                        | Pg 2-3                          |
|                               | 10b    | List and define all other variables for which data were sought (e.g. participant and intervention characteristics, funding sources). Describe any assumptions made about any missing or unclear information.                                                                                         | Pg 3                            |
| Study risk of bias assessment | 11     | Specify the methods used to assess risk of bias in the included studies, including details of the tool(s) used, how many reviewers assessed each study and whether they worked independently, and if applicable, details of automation tools used in the process.                                    | Pg 3                            |
| Effect measures               | 12     | Specify for each outcome the effect measure(s) (e.g. risk ratio, mean difference) used in the synthesis or presentation of results.                                                                                                                                                                  | Pg 3-4                          |
| Synthesis methods             | 13a    | Describe the processes used to decide which studies were eligible for each synthesis (e.g. tabulating the study intervention characteristics and comparing against the planned groups for each synthesis (item #5)).                                                                                 | Pg 3                            |
|                               | 13b    | Describe any methods required to prepare the data for presentation or synthesis, such as handling of missing summary statistics, or data conversions.                                                                                                                                                | Pg 3                            |
|                               | 13c    | Describe any methods used to tabulate or visually display results of individual studies and syntheses.                                                                                                                                                                                               | Pg 3                            |
|                               | 13d    | Describe any methods used to synthesize results and provide a rationale for the choice(s). If meta-analysis was performed, describe the model(s), method(s) to identify the presence and extent of statistical heterogeneity, and software package(s) used.                                          | Pg 3-4                          |
|                               | 13e    | Describe any methods used to explore possible causes of heterogeneity among study results (e.g. subgroup analysis, meta-regression).                                                                                                                                                                 | Pg 3-4                          |
|                               | 13f    | Describe any sensitivity analyses conducted to assess robustness of the synthesized results.                                                                                                                                                                                                         | Pg 3                            |
| Reporting bias assessment     | 14     | Describe any methods used to assess risk of bias due to missing results in a synthesis (arising from reporting biases).                                                                                                                                                                              | -                               |
| Certainty assessment          | 15     | Describe any methods used to assess certainty (or confidence) in the body of evidence for an outcome.                                                                                                                                                                                                | Pg 3                            |

| Section and Topic                              | Item # | Checklist item                                                                                                                                                                                                                                                                       | Location where item is reported |
|------------------------------------------------|--------|--------------------------------------------------------------------------------------------------------------------------------------------------------------------------------------------------------------------------------------------------------------------------------------|---------------------------------|
| <b>RESULTS</b>                                 |        |                                                                                                                                                                                                                                                                                      |                                 |
| Study selection                                | 16a    | Describe the results of the search and selection process, from the number of records identified in the search to the number of studies included in the review, ideally using a flow diagram.                                                                                         | Pg 4                            |
|                                                | 16b    | Cite studies that might appear to meet the inclusion criteria, but which were excluded, and explain why they were excluded.                                                                                                                                                          | -                               |
| Study characteristics                          | 17     | Cite each included study and present its characteristics.                                                                                                                                                                                                                            | Supplementary 3                 |
| Risk of bias in studies                        | 18     | Present assessments of risk of bias for each included study.                                                                                                                                                                                                                         | Pg 4                            |
| Results of individual studies                  | 19     | For all outcomes, present, for each study: (a) summary statistics for each group (where appropriate) and (b) an effect estimate and its precision (e.g. confidence/credible interval), ideally using structured tables or plots.                                                     | Pg 4-5                          |
| Results of syntheses                           | 20a    | For each synthesis, briefly summarise the characteristics and risk of bias among contributing studies.                                                                                                                                                                               | Pg 4                            |
|                                                | 20b    | Present results of all statistical syntheses conducted. If meta-analysis was done, present for each the summary estimate and its precision (e.g. confidence/credible interval) and measures of statistical heterogeneity. If comparing groups, describe the direction of the effect. | Pg 4-5                          |
|                                                | 20c    | Present results of all investigations of possible causes of heterogeneity among study results.                                                                                                                                                                                       | Pg 4-5                          |
|                                                | 20d    | Present results of all sensitivity analyses conducted to assess the robustness of the synthesized results.                                                                                                                                                                           | Pg 4-5                          |
| Reporting biases                               | 21     | Present assessments of risk of bias due to missing results (arising from reporting biases) for each synthesis assessed.                                                                                                                                                              | -                               |
| Certainty of evidence                          | 22     | Present assessments of certainty (or confidence) in the body of evidence for each outcome assessed.                                                                                                                                                                                  | Pg 4-5                          |
| <b>DISCUSSION</b>                              |        |                                                                                                                                                                                                                                                                                      |                                 |
| Discussion                                     | 23a    | Provide a general interpretation of the results in the context of other evidence.                                                                                                                                                                                                    | Pg 5-7                          |
|                                                | 23b    | Discuss any limitations of the evidence included in the review.                                                                                                                                                                                                                      | Pg 7                            |
|                                                | 23c    | Discuss any limitations of the review processes used.                                                                                                                                                                                                                                | Pg 7                            |
|                                                | 23d    | Discuss implications of the results for practice, policy, and future research.                                                                                                                                                                                                       | Pg 7-8                          |
| <b>OTHER INFORMATION</b>                       |        |                                                                                                                                                                                                                                                                                      |                                 |
| Registration and protocol                      | 24a    | Provide registration information for the review, including register name and registration number, or state that the review was not registered.                                                                                                                                       | Pg 2                            |
|                                                | 24b    | Indicate where the review protocol can be accessed, or state that a protocol was not prepared.                                                                                                                                                                                       | -                               |
|                                                | 24c    | Describe and explain any amendments to information provided at registration or in the protocol.                                                                                                                                                                                      | -                               |
| Support                                        | 25     | Describe sources of financial or non-financial support for the review, and the role of the funders or sponsors in the review.                                                                                                                                                        | Pg 0                            |
| Competing interests                            | 26     | Declare any competing interests of review authors.                                                                                                                                                                                                                                   | Pg 0                            |
| Availability of data, code and other materials | 27     | Report which of the following are publicly available and where they can be found: template data collection forms; data extracted from included studies; data used for all analyses; analytic code; any other materials used in the review.                                           | -                               |

**Table S2: Search Query for Literature**

| Database | Search Query |
|----------|--------------|
|----------|--------------|

|        |                                                                                                                                                                                                                                                                                                                                                                                                                                                                                                                                                                                                                                                                                                                                                                                                                                                                                                                                                                                                                                                                                                                                                                                                                                                                                                                                                                                                                                                                                                                                                                                                              |
|--------|--------------------------------------------------------------------------------------------------------------------------------------------------------------------------------------------------------------------------------------------------------------------------------------------------------------------------------------------------------------------------------------------------------------------------------------------------------------------------------------------------------------------------------------------------------------------------------------------------------------------------------------------------------------------------------------------------------------------------------------------------------------------------------------------------------------------------------------------------------------------------------------------------------------------------------------------------------------------------------------------------------------------------------------------------------------------------------------------------------------------------------------------------------------------------------------------------------------------------------------------------------------------------------------------------------------------------------------------------------------------------------------------------------------------------------------------------------------------------------------------------------------------------------------------------------------------------------------------------------------|
| PubMed | ((("meningeal"[All Fields] OR "meninges"[MeSH Terms] OR "meninges"[All Fields] OR "meninge"[All Fields] OR "meningism"[MeSH Terms] OR "meningism"[All Fields] OR "meningisms"[All Fields] OR "meningitis"[MeSH Terms] OR "meningitis"[All Fields] OR "meningitides"[All Fields]) AND ("epidemiology"[MeSH Subheading] OR "epidemiology"[All Fields] OR "incidence"[All Fields] OR "incidence"[MeSH Terms] OR "incidences"[All Fields] OR "incident"[All Fields] OR "incidents"[All Fields] OR ("epidemiology"[MeSH Subheading] OR "epidemiology"[All Fields] OR "prevalence"[All Fields] OR "prevalence"[MeSH Terms] OR "prevalance"[All Fields] OR "prevalences"[All Fields] OR "prevalence s"[All Fields] OR "prevalent"[All Fields] OR "prevalently"[All Fields] OR "prevalents"[All Fields]) OR ("mortality"[MeSH Terms] OR "mortality"[All Fields] OR "mortalities"[All Fields] OR "mortality"[MeSH Subheading]) OR ("epidemiology"[MeSH Subheading] OR "epidemiology"[All Fields] OR "morbidity"[All Fields] OR "morbidity"[MeSH Terms] OR "morbid"[All Fields] OR "morbidity"[All Fields] OR "morbids"[All Fields]) OR "sequela*" [All Fields] OR ((("ieee int conf automation sci eng case"[Journal] OR "case phila"[Journal] OR "case"[All Fields]) AND ("fatal"[All Fields] OR "fatalities"[All Fields] OR "fatality"[All Fields] OR "fatally"[All Fields])) OR (("risk"[MeSH Terms] OR "risk"[All Fields]) AND "factor*" [All Fields])))) AND ((humans[Filter]) AND (allchild[Filter] OR allinfant[Filter] OR infant[Filter] OR newborn[Filter] OR preschoolchild[Filter]) AND (2010:2020[pdat])) |
| Scopus | TITLE-ABS-KEY ( meningitis AND ( incidence OR prevalence OR mortality OR morbidity OR sequela* OR case AND fatality OR risk AND factor* ) ) AND ( LIMIT-TO ( PUBYEAR , 2019 ) OR LIMIT-TO ( PUBYEAR , 2018 ) OR LIMIT-TO ( PUBYEAR , 2017 ) OR LIMIT-TO ( PUBYEAR , 2016 ) OR LIMIT-TO ( PUBYEAR , 2015 ) OR LIMIT-TO ( PUBYEAR , 2014 ) OR LIMIT-TO ( PUBYEAR , 2013 ) OR LIMIT-TO ( PUBYEAR , 2012 ) OR LIMIT-TO ( PUBYEAR , 2011 ) OR LIMIT-TO ( PUBYEAR , 2010 ) ) AND ( LIMIT-TO ( EXACTKEYWORD , "human" ) OR LIMIT-TO ( EXACTKEYWORD , "humans" ) )                                                                                                                                                                                                                                                                                                                                                                                                                                                                                                                                                                                                                                                                                                                                                                                                                                                                                                                                                                                                                                                   |

**Table S3: WHO definition of Acute meningitis\***

|                                                                                                                                                                                                                                                                                                                                                                                                                                                                                                                                                            |
|------------------------------------------------------------------------------------------------------------------------------------------------------------------------------------------------------------------------------------------------------------------------------------------------------------------------------------------------------------------------------------------------------------------------------------------------------------------------------------------------------------------------------------------------------------|
| <b>Suspected Meningitis for Case Finding</b>                                                                                                                                                                                                                                                                                                                                                                                                                                                                                                               |
| <ul style="list-style-type: none"> <li>Any child aged 0-59 months admitted to hospital with sudden onset fever (&gt;38.5°C rectal or 38°C axillary) and one of the following signs: neck stiffness, altered consciousness with no other alternative diagnosis, or other meningeal signs OR</li> <li>Any patient aged 0-59 months hospitalised with a clinical diagnosis of meningitis</li> </ul>                                                                                                                                                           |
| <b>Probable Bacterial Meningitis</b>                                                                                                                                                                                                                                                                                                                                                                                                                                                                                                                       |
| <p>A suspected meningitis case with cerebrospinal fluid (CSF) examination showing at least one of the following:</p> <ul style="list-style-type: none"> <li>Turbid appearance</li> <li>Leucocytosis (&gt;100 cells/mm<sup>3</sup>)</li> <li>Leucocytosis (10-100 cells/mm<sup>3</sup>) AND either an elevated protein (&gt; 100 mg/dL) or decreased glucose (&lt; 40 mg/dL). Note: If protein and glucose results are not available, diagnosis using the first two conditions (turbid appearance or leucocytosis &gt; 100 cells/mm<sup>3</sup>)</li> </ul> |
| <b>Confirmed H. Influenzae Meningitis</b>                                                                                                                                                                                                                                                                                                                                                                                                                                                                                                                  |
| <p>A suspected or probable meningitis case that is laboratory-confirmed by culture or identification of H. Influenzae (by antigen detection, immunochromatography, polymerase chain reaction (PCR) or other methods) in the CSF or blood from a child with a clinical syndrome consistent with meningitis.</p>                                                                                                                                                                                                                                             |

\*Haemophilus influenzae [Internet]. Who.int. 2018 [cited 17 July 2021]. Available from: [https://www.who.int/immunization/monitoring\\_surveillance/burden/vpd/WHO\\_SurveillanceVaccinePreventable\\_05\\_HaemophilusInfluenzae\\_R2.pdf?ua=1](https://www.who.int/immunization/monitoring_surveillance/burden/vpd/WHO_SurveillanceVaccinePreventable_05_HaemophilusInfluenzae_R2.pdf?ua=1)

**Table S4: Data Extraction**

| Author/Year of Publication | Study Period | Median Study Year | Study Era | WHO Region | Study Site                                                                        | Study Design | Study Duration (Mo) | Study Setting | Vaccination Era | Vaccine Introduction Year | Diagnostic Criteria | Age Range (mo) | Number of Cases (Confirmed AllPRO YEARS) | Number of Deaths (Confirmed AllPRO YEARS) | Population Denominator | Incidence (per 100,000 Age $\leq$ 5) | Case-Fatality Rate (CFR) | Quality |
|----------------------------|--------------|-------------------|-----------|------------|-----------------------------------------------------------------------------------|--------------|---------------------|---------------|-----------------|---------------------------|---------------------|----------------|------------------------------------------|-------------------------------------------|------------------------|--------------------------------------|--------------------------|---------|
| Ba O et al., 2010          | 2006         | 2006              | 0         | AFR        | Senegal                                                                           | 1            | 12                  | 2             | 2               | 2005                      | BC, LA, CSF, B      | 0-59           | 30.00                                    | 12.86                                     | 1,312,300.00           | 2.2861                               | 0.42857143               | 9       |
| Ba O et al., 2010          | 2007         | 2007              | 0         | AFR        | Senegal                                                                           | 1            | 12                  | 2             | 2               | 2005                      | BC, LA, CSF, B      | 0-59           | 8.00                                     | 3.43                                      | 1,312,300.00           | 0.6096                               | 0.42857143               | 9       |
| Ba O et al., 2010          | 2008         | 2008              | 0         | AFR        | Senegal                                                                           | 1            | 12                  | 2             | 2               | 2005                      | BC, LA, CSF, B      | 0-59           | 4.00                                     | 1.71                                      | 1,312,300.00           | 0.3048                               | 0.42857143               | 9       |
| Ba O et al., 2010          | 2002         | 2002              | 0         | AFR        | Dakar                                                                             | 1            | 12                  | 2             | 1               | 2005                      | BC, LA, CSF, B      | 0-59           | 41.00                                    | NP                                        | 269,900.00             | 15.1908                              | NP                       | 9       |
| Ba O et al., 2010          | 2003         | 2003              | 0         | AFR        | Dakar                                                                             | 1            | 12                  | 2             | 1               | 2005                      | BC, LA, CSF, B      | 0-59           | 30.00                                    | NP                                        | 269,900.00             | 11.1152                              | NP                       | 9       |
| Ba O et al., 2010          | 2004         | 2004              | 0         | AFR        | Dakar                                                                             | 1            | 12                  | 2             | 1               | 2005                      | BC, LA, CSF, B      | 0-59           | 56.00                                    | NP                                        | 269,900.00             | 20.7484                              | NP                       | 9       |
| Ba O et al., 2010          | 2005         | 2005              | 0         | AFR        | Dakar                                                                             | 1            | 6                   | 2             | 1               | 2005                      | BC, LA, CSF, B      | 0-59           | 24.00                                    | NP                                        | 269,900.00             | 8.8922                               | NP                       | 9       |
| Ba O et al., 2010          | 2005         | 2005              | 0         | AFR        | Dakar                                                                             | 1            | 6                   | 2             | 2               | 2005                      | BC, LA, CSF, B      | 0-59           | 16.00                                    | NP                                        | 269,900.00             | 5.9281                               | NP                       | 9       |
| Ba O et al., 2010          | 2006         | 2006              | 0         | AFR        | Dakar                                                                             | 1            | 12                  | 2             | 2               | 2005                      | BC, LA, CSF, B      | 0-59           | 12.00                                    | NP                                        | 269,900.00             | 4.4461                               | NP                       | 9       |
| Ba O et al., 2010          | 2007         | 2007              | 0         | AFR        | Dakar                                                                             | 1            | 12                  | 2             | 2               | 2005                      | BC, LA, CSF, B      | 0-59           | 2.00                                     | NP                                        | 269,900.00             | 0.7410                               | NP                       | 9       |
| Ba O et al., 2010          | 2008         | 2008              | 0         | AFR        | Dakar                                                                             | 1            | 12                  | 2             | 2               | 2005                      | BC, LA, CSF, B      | 0-59           | 1.00                                     | NP                                        | 269,900.00             | 0.3705                               | NP                       | 9       |
| Edmond et al., 2010        | 2009         | 2009              | 0         | AFR        | Dakar, Senegal                                                                    | 1            | 12                  | 1             | 2               | 2005                      | CSF, LA             | 1-59           | 24.00                                    | NP                                        | 312,300.00             | 7.68491835                           | NP                       | 7       |
| Kaboré NF et al., 2012     | 2004-2005    | 2005              | 0         | AFR        | Burkina Faso (Bobo Dioulasso)                                                     | 2            | 24                  | 2             | 1               | 2006                      | CSF, PCR, BC, LA, G | 0-59           | 47.00                                    | NP                                        | 166,109.81             | 28.2945357                           | NP                       | 7       |
| Kaboré NF et al., 2012     | 2006-2008    | 2007              | 0         | AFR        | Burkina Faso (Bobo Dioulasso)                                                     | 2            | 36                  | 2             | 2               | 2006                      | CSF, PCR, BC, LA, G | 0-59           | 27.00                                    | NP                                        | 280,515.46             | 9.62513792                           | NP                       | 7       |
| Kambiré D et al., 2016     | 2011         | 2011              | 1         | AFR        | Burkina Faso                                                                      | 1            | 12                  | 1             | 2               | 2006                      | CSF, PCR, BC, LA, G | 0-59           | 16.00                                    | 1.22                                      | 1,600,000.00           | 1                                    | 0.07625                  | 10      |
| Kambiré D et al., 2016     | 2012         | 2012              | 1         | AFR        | Burkina Faso                                                                      | 1            | 12                  | 1             | 2               | 2006                      | CSF, PCR, BC, LA, G | 0-59           | 13.00                                    | 0.00                                      | 1,625,000.00           | 0.8                                  | 0                        | 10      |
| Kambiré D et al., 2016     | 2013         | 2013              | 1         | AFR        | Burkina Faso                                                                      | 1            | 12                  | 1             | 2               | 2006                      | CSF, PCR, BC, LA, G | 0-59           | 14.00                                    | 1.64                                      | 2,333,333.33           | 0.6                                  | 0.11714286               | 10      |
| Karou SD et al., 2012      | 2007-2010    | 2009              | 0         | AFR        | Togo                                                                              | 2            | 48                  | 2             | 1+2             | 2008                      | CSF, BC, G          | 0-59           | 14.00                                    | NP                                        | 549,534.77             | 2.54760948                           | NP                       | 3       |
| Mwenda JM et al., 2019     | 2011         | 2011              | 1         | AFR        | South East Africa (Ethiopia, Lesotho, Madagascar, Kingdom of Eswatini, Swaziland) | 1            | 12                  | 1             | 2               | 2007                      | PCR, CSF, S         | 1-59           | 1.00                                     | NP                                        | 4644803.678            | 0.02152944                           | NP                       | 6       |

|                         |           |      |   |     |                                                                                                             |   |    |   |   |      |                  |      |       |       |             |            |            |   |  |
|-------------------------|-----------|------|---|-----|-------------------------------------------------------------------------------------------------------------|---|----|---|---|------|------------------|------|-------|-------|-------------|------------|------------|---|--|
|                         |           |      |   |     | Uganda, Zambia, Zimbabwe                                                                                    |   |    |   |   |      |                  |      |       |       |             |            |            |   |  |
| Mwenda JM et al., 2019  | 2012      | 2012 | 1 | AFR | South East Africa (Ethiopia, Lesotho, Madagascar, Kingdom of Eswatini, Swaziland, Uganda, Zambia, Zimbabwe) | 1 | 12 | 1 | 2 | 2007 | PCR, CSF, S      | 1-59 | 9.00  | NP    | 4703752.899 | 0.19133658 | NP         | 6 |  |
| Mwenda JM et al., 2019  | 2013      | 2013 | 1 | AFR | South East Africa (Ethiopia, Lesotho, Madagascar, Kingdom of Eswatini, Swaziland, Uganda, Zambia, Zimbabwe) | 1 | 12 | 1 | 2 | 2007 | PCR, CSF, S      | 1-59 | 10.00 | NP    | 4943658     | 0.20227936 | NP         | 6 |  |
| Mwenda JM et al., 2019  | 2014      | 2014 | 1 | AFR | South East Africa (Ethiopia, Lesotho, Madagascar, Kingdom of Eswatini, Swaziland, Uganda, Zambia, Zimbabwe) | 1 | 12 | 1 | 2 | 2007 | PCR, CSF, S      | 1-59 | 11.00 | NP    | 5106123.716 | 0.2154276  | NP         | 6 |  |
| Mwenda JM et al., 2019  | 2015      | 2015 | 1 | AFR | South East Africa (Ethiopia, Lesotho, Madagascar, Kingdom of Eswatini, Swaziland, Uganda, Zambia, Zimbabwe) | 1 | 12 | 1 | 2 | 2007 | PCR, CSF, S      | 1-59 | 10.00 | NP    | 5246857.624 | 0.19059027 | NP         | 6 |  |
| Mwenda JM et al., 2019  | 2016      | 2016 | 1 | AFR | South East Africa (Ethiopia, Lesotho, Madagascar, Kingdom of Eswatini, Swaziland, Uganda, Zambia, Zimbabwe) | 1 | 12 | 1 | 2 | 2007 | LA, PCR, CSF, S  | 1-59 | 12.00 | NP    | 5400276.569 | 0.22221084 | NP         | 6 |  |
| Mwenda JM et al., 2019  | 2011      | 2011 | 1 | AFR | West-Central Africa (Benin, Cameroon, Gambia, Ghana, Niger, Nigeria, Senegal, Togo)                         | 1 | 12 | 1 | 2 | 2007 | LA, PCR, CSF, S  | 1-59 | 0.00  | NP    | 2123693.9   | 0          | NP         | 6 |  |
| Mwenda JM et al., 2019  | 2012      | 2012 | 1 | AFR | West-Central Africa (Benin, Cameroon, Gambia, Ghana, Niger, Nigeria, Senegal, Togo)                         | 1 | 12 | 1 | 2 | 2007 | LA, PCR, CSF, S  | 1-59 | 2.00  | NP    | 2198433.9   | 0.09097385 | NP         | 6 |  |
| Mwenda JM et al., 2019  | 2013      | 2013 | 1 | AFR | West-Central Africa (Benin, Cameroon, Gambia, Ghana, Niger, Nigeria, Senegal, Togo)                         | 1 | 12 | 1 | 2 | 2007 | LA, PCR, CSF, S  | 1-59 | 4.00  | NP    | 2276620.2   | 0.17569905 | NP         | 6 |  |
| Mwenda JM et al., 2019  | 2014      | 2014 | 1 | AFR | West-Central Africa (Benin, Cameroon, Gambia, Ghana, Niger, Nigeria, Senegal, Togo)                         | 1 | 12 | 1 | 2 | 2007 | LA, PCR, CSF, S  | 1-59 | 7.00  | NP    | 2358596     | 0.29678673 | NP         | 6 |  |
| Mwenda JM et al., 2019  | 2015      | 2015 | 1 | AFR | West-Central Africa (Benin, Cameroon, Gambia, Ghana, Niger, Nigeria, Senegal, Togo)                         | 1 | 12 | 1 | 2 | 2007 | LA, PCR, CSF, S  | 1-59 | 2.00  | NP    | 2444355.3   | 0.08182117 | NP         | 6 |  |
| Mwenda JM et al., 2019  | 2016      | 2016 | 1 | AFR | West-Central Africa (Benin, Cameroon, Gambia, Ghana, Niger, Nigeria, Senegal, Togo)                         | 1 | 12 | 1 | 2 | 2007 | LA, PCR, CSF, S  | 1-59 | 4.00  | NP    | 2533764.4   | 0.15786787 | NP         | 6 |  |
| Soeters HM et al., 2019 | 2015-2017 | 2016 | 1 | AFR | MenAfriNet (Burkina Faso, Chad, Mali, Niger, Togo)                                                          | 1 | 36 | 2 | 2 | 2008 | CSF, PCR, LA, BC | 0-59 | 85.63 | 13.27 | 15692300.81 | 0.54565612 | 0.15492958 | 7 |  |

|                             |           |      |   |     |                        |   |    |   |     |      |                        |      |        |       |               |            |            |   |
|-----------------------------|-----------|------|---|-----|------------------------|---|----|---|-----|------|------------------------|------|--------|-------|---------------|------------|------------|---|
| Tagbo BN et al., 2019       | 2010      | 2010 | 1 | AFR | Nigeria                | 1 | 12 | 2 | 1   | 2012 | CSF, BC, G, LA, PCR, S | 0.59 | 0.00   | 0.00  | 5,440,000.00  | 0          | 0          | 8 |
| Tagbo BN et al., 2019       | 2011      | 2011 | 1 | AFR | Nigeria                | 1 | 12 | 2 | 1   | 2012 | CSF, BC, G, LA, PCR, S | 0.59 | 0.00   | 0.00  | 5,440,000.00  | 0          | 0          | 8 |
| Tagbo BN et al., 2019       | 2012      | 2012 | 1 | AFR | Nigeria                | 1 | 12 | 2 | 1+2 | 2012 | CSF, BC, G, LA, PCR, S | 0.59 | 1.00   | 0.03  | 5,440,000.00  | 0.01838235 | 0.034      | 8 |
| Tagbo BN et al., 2019       | 2013      | 2013 | 1 | AFR | Nigeria                | 1 | 12 | 2 | 1+2 | 2012 | CSF, BC, G, LA, PCR, S | 0.59 | 2.00   | 0.07  | 5,440,000.00  | 0.03676471 | 0.034      | 8 |
| Tagbo BN et al., 2019       | 2014      | 2014 | 1 | AFR | Nigeria                | 1 | 12 | 2 | 1+2 | 2012 | CSF, BC, G, LA, PCR, S | 0.59 | 0.00   | 0.00  | 5,440,000.00  | 0          | 0          | 8 |
| Tagbo BN et al., 2019       | 2015      | 2015 | 1 | AFR | Nigeria                | 1 | 12 | 2 | 2   | 2012 | CSF, BC, G, LA, PCR, S | 0.59 | 0.00   | 0.00  | 5,440,000.00  | 0          | 0          | 8 |
| Tagbo BN et al., 2019       | 2016      | 2016 | 1 | AFR | Nigeria                | 1 | 12 | 2 | 2   | 2012 | CSF, BC, G, LA, PCR, S | 0.59 | 8.00   | 0.27  | 5,440,000.00  | 0.14705882 | 0.034      | 8 |
| Von Gottberg A et al., 2012 | 2003-2009 | 2006 | 0 | AFR | South Africa           | 2 | 84 | 1 | 2   | 1999 | CSF, B, LA, G, PCR     | 0.59 | 349.00 | 66.31 | 35,420,157.50 | 0.98531465 | 0.19       | 7 |
| Gentile et al., 2017        | 1992      | 1992 | 0 | AMR | Bueno Aires, Argentina | 2 | 12 | 2 | 1   | 1997 | CSF, G, BC, B, A       | 0.59 | 10.00  | 0.57  | 182,234.00    | 5.4874502  | 0.05714286 | 7 |
| Gentile et al., 2017        | 1993      | 1993 | 0 | AMR | Bueno Aires, Argentina | 2 | 12 | 2 | 1   | 1997 | CSF, G, BC, B, A       | 0.59 | 19.00  | 0.57  | 182,234.00    | 10.4261554 | 0.03007519 | 7 |
| Gentile et al., 2017        | 1994      | 1994 | 0 | AMR | Bueno Aires, Argentina | 2 | 12 | 2 | 1   | 1997 | CSF, G, BC, B, A       | 0.59 | 10.00  | 0.57  | 182,234.00    | 5.4874502  | 0.05714286 | 7 |
| Gentile et al., 2017        | 1995      | 1995 | 0 | AMR | Bueno Aires, Argentina | 2 | 12 | 2 | 1   | 1997 | CSF, G, BC, B, A       | 0.59 | 9.00   | 0.57  | 182,234.00    | 4.93870518 | 0.06349206 | 7 |
| Gentile et al., 2017        | 1996      | 1996 | 0 | AMR | Bueno Aires, Argentina | 2 | 12 | 2 | 1   | 1997 | CSF, G, BC, B, A       | 0.59 | 12.00  | 0.57  | 182,234.00    | 6.58494024 | 0.04761905 | 7 |
| Gentile et al., 2017        | 1997      | 1997 | 0 | AMR | Bueno Aires, Argentina | 2 | 12 | 2 | 1   | 1997 | CSF, G, BC, B, A       | 0.59 | 3.00   | 0.57  | 182,234.00    | 1.64623506 | 0.19047619 | 7 |
| Gentile et al., 2017        | 1998      | 1998 | 0 | AMR | Bueno Aires, Argentina | 2 | 12 | 2 | 1+2 | 1997 | CSF, G, BC, B, A       | 0.59 | 7.00   | 0.57  | 182,234.00    | 3.84121514 | 0.08163265 | 7 |
| Gentile et al., 2017        | 1999      | 1999 | 0 | AMR | Bueno Aires, Argentina | 2 | 12 | 2 | 2   | 1997 | CSF, G, BC, B, A       | 0.59 | 0.00   | 0.00  | 182,234.00    | 0          | 0          | 7 |

|                           |           |      |   |     |                           |   |     |   |       |      |                    |      |        |       |               |            |       |    |
|---------------------------|-----------|------|---|-----|---------------------------|---|-----|---|-------|------|--------------------|------|--------|-------|---------------|------------|-------|----|
| Gentile et al., 2017      | 2000      | 2000 | 0 | AMR | Bueno Aires, Argentina    | 2 | 12  | 2 | 2     | 1997 | CSF, G, BC, B, A   | 0.59 | 0.00   | 0.00  | 182,234.00    | 0          | 0     | 7  |
| Gentile et al., 2017      | 2001      | 2001 | 0 | AMR | Bueno Aires, Argentina    | 2 | 12  | 2 | 2     | 1997 | CSF, G, BC, B, A   | 0.59 | 1.00   | 0.00  | 157,607.00    | 0.63448958 | 0     | 7  |
| Gentile et al., 2017      | 2002      | 2002 | 0 | AMR | Bueno Aires, Argentina    | 2 | 12  | 2 | 2     | 1997 | CSF, G, BC, B, A   | 0.59 | 0.00   | 0.00  | 157,607.00    | 0          | 0     | 7  |
| Gentile et al., 2017      | 2003      | 2003 | 0 | AMR | Bueno Aires, Argentina    | 2 | 12  | 2 | 2     | 1997 | CSF, G, BC, B, A   | 0.59 | 0.00   | 0.00  | 157,607.00    | 0          | 0     | 7  |
| Gentile et al., 2017      | 2004      | 2004 | 0 | AMR | Bueno Aires, Argentina    | 2 | 12  | 2 | 2     | 1997 | CSF, G, BC, B, A   | 0.59 | 0.00   | 0.00  | 157,607.00    | 0          | 0     | 7  |
| Gentile et al., 2017      | 2005      | 2005 | 0 | AMR | Bueno Aires, Argentina    | 2 | 12  | 2 | 2     | 1997 | CSF, G, BC, B, A   | 0.59 | 2.00   | 0.00  | 157,607.00    | 1.26897917 | 0     | 7  |
| Gentile et al., 2017      | 2006      | 2006 | 0 | AMR | Bueno Aires, Argentina    | 2 | 12  | 2 | 2     | 1997 | CSF, G, BC, B, A   | 0.59 | 0.00   | 0.00  | 157,607.00    | 0          | 0     | 7  |
| Gentile et al., 2017      | 2007      | 2007 | 0 | AMR | Bueno Aires, Argentina    | 2 | 12  | 2 | 2     | 1997 | CSF, G, BC, B, A   | 0.59 | 0.00   | 0.00  | 157,607.00    | 0          | 0     | 7  |
| Gentile et al., 2017      | 2008      | 2008 | 0 | AMR | Bueno Aires, Argentina    | 2 | 12  | 2 | 2     | 1997 | CSF, G, BC, B, A   | 0.59 | 2.00   | 0.00  | 157,607.00    | 1.26897917 | 0     | 7  |
| Gentile et al., 2017      | 2009      | 2009 | 0 | AMR | Bueno Aires, Argentina    | 2 | 12  | 2 | 2     | 1997 | CSF, G, BC, B, A   | 0.59 | 0.00   | 0.00  | 157,607.00    | 0          | 0     | 7  |
| Gentile et al., 2017      | 2010      | 2010 | 1 | AMR | Bueno Aires, Argentina    | 2 | 12  | 2 | 2     | 1997 | CSF, G, BC, B, A   | 0.59 | 0.00   | 0.00  | 165,638.00    | 0          | 0     | 7  |
| Gentile et al., 2017      | 2011      | 2011 | 1 | AMR | Bueno Aires, Argentina    | 2 | 12  | 2 | 2     | 1997 | CSF, G, BC, B, A   | 0.59 | 0.00   | 0.00  | 165,638.00    | 0          | 0     | 7  |
| Gentile et al., 2017      | 2012      | 2012 | 1 | AMR | Bueno Aires, Argentina    | 2 | 12  | 2 | 2     | 1997 | CSF, G, BC, B, A   | 0.59 | 0.00   | 0.00  | 165,638.00    | 0          | 0     | 7  |
| Gentile et al., 2017      | 2013      | 2013 | 1 | AMR | Bueno Aires, Argentina    | 2 | 12  | 2 | 2     | 1997 | CSF, G, BC, B, A   | 0.59 | 0.00   | 0.00  | 165,638.00    | 0          | 0     | 7  |
| Gentile et al., 2017      | 2014      | 2014 | 1 | AMR | Bueno Aires, Argentina    | 2 | 12  | 2 | 2     | 1997 | CSF, G, BC, B, A   | 0.59 | 3.00   | 0.00  | 165,638.00    | 1.81117859 | 0     | 7  |
| Gentile et al., 2017      | 2015      | 2015 | 1 | AMR | Bueno Aires, Argentina    | 2 | 12  | 2 | 2     | 1997 | CSF, G, BC, B, A   | 0.59 | 5.00   | 0.00  | 165,638.00    | 3.01863099 | 0     | 7  |
| Gentile et al., 2017      | 2016      | 2016 | 1 | AMR | Bueno Aires, Argentina    | 2 | 12  | 2 | 2     | 1997 | CSF, G, BC, B, A   | 0.59 | 2.00   | 0.00  | 165,638.00    | 1.2074524  | 0     | 7  |
| Schossler JG et al., 2013 | 1999-2010 | 2005 | 0 | AMR | Rio Grande do Sul, Brazil | 2 | 144 | 1 | 2     | 1999 | CSF, B             | 0.59 | 170.56 | #REF! | 9,659,430.00  | 1.77       | #REF! | 4  |
| Zanella RC et al., 2011   | 2000-2002 | 2001 | 0 | AMR | Brazil                    | 2 | 36  | 1 | 2     | 1999 | B, CSF, G, LA, PCR | 0.59 | 54.00  | NP    | 3,292,683.00  | 1.64       | NP    | 9  |
| Zanella RC et al., 2011   | 2003-2005 | 2004 | 0 | AMR | Brazil                    | 2 | 36  | 1 | 2     | 1999 | B, CSF, G, LA, PCR | 0.59 | 16.00  | NP    | 3,200,000.00  | 0.5        | NP    | 9  |
| Zanella RC et al., 2011   | 2006-2008 | 2007 | 0 | AMR | Brazil                    | 2 | 36  | 1 | 2     | 1999 | B, CSF, G, LA, PCR | 0.59 | 19.00  | NP    | 4,523,810.00  | 0.42       | NP    | 9  |
| Braikat M et al., 2012    | 2004-2009 | 2007 | 0 | EMR | Morocco                   | 2 | 72  | 2 | 1 + 2 | 2007 | CSF, LA, G         | 0.59 | 105.00 | 42.00 | 17,848,638.00 | 0.58828018 | 0.4   | 10 |

|                          |           |      |   |     |                                 |   |    |   |     |      |                     |      |       |      |              |            |            |    |
|--------------------------|-----------|------|---|-----|---------------------------------|---|----|---|-----|------|---------------------|------|-------|------|--------------|------------|------------|----|
| Braikat M et al., 2012   | 2004      | 2004 | 0 | EMR | Morocco                         | 2 | 12 | 2 | 1   | 2007 | CSF, LA, G          | 0.59 | 19.00 | NP   | 2,974,773.00 | 0.6387042  | NP         | 10 |
| Braikat M et al., 2012   | 2005      | 2005 | 0 | EMR | Morocco                         | 2 | 12 | 2 | 1   | 2007 | CSF, LA, G          | 0.59 | 29.00 | NP   | 2,974,773.00 | 0.9748643  | NP         | 10 |
| Braikat M et al., 2012   | 2006      | 2006 | 0 | EMR | Morocco                         | 2 | 12 | 2 | 1   | 2007 | CSF, LA, G          | 0.59 | 24.00 | NP   | 2,974,773.00 | 0.80678425 | NP         | 10 |
| Braikat M et al., 2012   | 2007      | 2007 | 0 | EMR | Morocco                         | 2 | 12 | 2 | 1+2 | 2007 | CSF, LA, G          | 0.59 | 21.00 | NP   | 2,974,773.00 | 0.70593622 | NP         | 10 |
| Braikat M et al., 2012   | 2008      | 2008 | 0 | EMR | Morocco                         | 2 | 12 | 2 | 2   | 2007 | CSF, LA, G          | 0.59 | 7.00  | NP   | 2,974,773.00 | 0.23531207 | NP         | 10 |
| Braikat M et al., 2012   | 2009      | 2009 | 0 | EMR | Morocco                         | 2 | 12 | 2 | 2   | 2007 | CSF, LA, G          | 0.59 | 5.00  | NP   | 2,974,773.00 | 0.16808005 | NP         | 10 |
| Khailifa AB et al., 2011 | 1999-2006 | 2003 | 0 | EMR | Monastir region, Tunisia        | 2 | 96 | 2 | 1+2 | 2011 | CSF, LA             | 3.59 | 29.00 | NP   | 417,639.16   | 6.94379324 | NP         | 4  |
| Khowaja AR et al., 2013  | 2008-2011 | 2010 | 1 | EMR | Pakistan                        | 1 | 42 | 2 | 2   | 2009 | CSF, LA, PCR        | 0.59 | 26.00 | 7.00 | 1,889,596.80 | 1.37595491 | 0.26923077 | 8  |
| Teleb N et al., 2013     | 2005      | 2005 | 0 | EMR | Pakistan (Lahore, Karachi City) | 1 | 12 | 1 | 1   | 2009 | CSF, G, BC, PCR, LA | 1.59 | 2.00  | NP   | 2,551,775.74 | 0.07837679 | NP         | 7  |
| Teleb N et al., 2013     | 2006      | 2006 | 0 | EMR | Pakistan (Lahore, Karachi City) | 1 | 12 | 1 | 1   | 2009 | CSF, G, BC, PCR, LA | 1.59 | 10.00 | NP   | 2,603,062.53 | 0.38416288 | NP         | 7  |
| Teleb N et al., 2013     | 2007      | 2007 | 0 | EMR | Pakistan (Lahore, Karachi City) | 1 | 12 | 1 | 1   | 2009 | CSF, G, BC, PCR, LA | 1.59 | 7.00  | NP   | 2,655,787.68 | 0.26357529 | NP         | 7  |
| Teleb N et al., 2013     | 2008      | 2008 | 0 | EMR | Pakistan (Lahore, Karachi City) | 1 | 12 | 1 | 1   | 2009 | CSF, G, BC, PCR, LA | 1.59 | 0.00  | NP   | 2,709,742.60 | 0          | NP         | 7  |

|                             |           |      |   |      |                                 |   |     |   |     |      |                     |      |        |      |               |            |            |   |
|-----------------------------|-----------|------|---|------|---------------------------------|---|-----|---|-----|------|---------------------|------|--------|------|---------------|------------|------------|---|
| Teleb N et al., 2013        | 2009      | 2009 | 0 | EMR  | Pakistan (Labore, Karachi City) | 1 | 12  | 1 | 2   | 2009 | CSF, G, BC, PCR, LA | 1.59 | 3.00   | NP   | 2,677,680.63  | 0.11203726 | NP         | 7 |
| Teleb N et al., 2013        | 2010      | 2010 | 1 | EMR  | Pakistan (Labore, Karachi City) | 1 | 12  | 1 | 2   | 2009 | CSF, G, BC, PCR, LA | 1.59 | 2.00   | NP   | 2,727,923.77  | 0.07331583 | NP         | 7 |
| Zaidi AK et al., 2010       | 2004-2005 | 2005 | 0 | EMR  | Pakistan (Karachi)              | 1 | 12  | 2 | 1   | 2009 | CSF, LA, BC         | 0.59 | 28.00  | 0.00 | 2,333,333.33  | 1.2        | 0          | 7 |
| Zaidi AK et al., 2010       | 2004-2005 | 2005 | 0 | EMR  | Pakistan (Hyderabad)            | 1 | 12  | 2 | 1   | 2009 | CSF, LA, BC         | 0.59 | 17.00  | 0.00 | 222,855.00    | 7.6        | 0          | 7 |
| Ceyhan M et al., 2014       | 2005-2010 | 2008 | 0 | EUR  | Turkey                          | 1 | 72  | 2 | 1+2 | 2006 | G, BC, CSF, PCR, A  | 1.59 | 50.95  | 1.30 | 13,267,349.00 | 0.3840104  | NP         | 6 |
| Ceyhan M et al., 2014       | 2011-2012 | 2011 | 1 | EUR  | Turkey                          | 1 | 24  | 2 | 2   | 2006 | G, BC, CSF, PCR, A  | 1.59 | 1.00   | 1.30 | 4,422,449.67  | 0.0226119  | NP         | 6 |
| Collin S et al., 2013       | 2009-2012 | 2011 | 1 | EUR  | UK (England & Wales)            | 1 | 48  | 2 | 2   | 1992 | LA, PCR, CSF        | 0.59 | 15.00  | 1.00 | 38,333,333.00 | 0.03913    | 0.066667   | 4 |
| Griffiths et al., 2011      | 2002-2008 | 2005 | 0 | EUR  | Belarus                         | 2 | 84  | 1 | 2   | 2019 | CSF, BC             | 1.59 | 30     | NP   | 3,163,720.00  | 6.63775555 | NP         | 7 |
| Griffiths et al., 2011      | 2002      | 2002 | 0 | EUR  | Belarus                         | 2 | 12  | 1 | 2   | 2019 | CSF, BC             | 1.59 | 2.00   | NP   | 451,960.00    | 0.44251704 | NP         | 7 |
| Griffiths et al., 2011      | 2003      | 2003 | 0 | EUR  | Belarus                         | 2 | 12  | 1 | 2   | 2019 | CSF, BC             | 1.59 | 6.00   | NP   | 451,960.00    | 1.32755111 | NP         | 7 |
| Griffiths et al., 2011      | 2004      | 2004 | 0 | EUR  | Belarus                         | 2 | 12  | 1 | 2   | 2019 | CSF, BC             | 1.59 | 5.00   | NP   | 451,960.00    | 1.10629259 | NP         | 7 |
| Griffiths et al., 2011      | 2005      | 2005 | 0 | EUR  | Belarus                         | 2 | 12  | 1 | 2   | 2019 | CSF, BC             | 1.59 | 7.00   | NP   | 451,960.00    | 1.54880963 | NP         | 7 |
| Griffiths et al., 2011      | 2006      | 2006 | 0 | EUR  | Belarus                         | 2 | 12  | 1 | 2   | 2019 | CSF, BC             | 1.59 | 1.00   | NP   | 451,960.00    | 0.22125852 | NP         | 7 |
| Griffiths et al., 2011      | 2007      | 2007 | 0 | EUR  | Belarus                         | 2 | 12  | 1 | 2   | 2019 | CSF, BC             | 1.59 | 5.00   | NP   | 451,960.00    | 1.10629259 | NP         | 7 |
| Griffiths et al., 2011      | 2008      | 2008 | 0 | EUR  | Belarus                         | 2 | 12  | 1 | 2   | 2019 | CSF, BC             | 1.59 | 4.00   | NP   | 451,960.00    | 0.88503407 | NP         | 7 |
| Griffiths et al., 2011      | 2002-2004 | 2003 | 0 | EUR  | Uzbekistan                      | 2 | 36  | 1 | 2   | 2019 | PCR, CSF            | 1.59 | 14.00  | NP   | 9,486,453.00  | 0.14757887 | NP         | 7 |
| Hudeckova et al., 2010      | 1997-2007 | 2002 | 0 | EUR  | Slovakia                        | 2 | 132 | 1 | 2   | 2000 | CSF, LA             | 0.48 | 109.00 | NP   | 2,849,000.00  | 3.82590383 | NP         | 5 |
| Levy C et al., 2014         | 2001-2012 | 2007 | 0 | EUR  | France                          | 1 | 144 | 2 | 2   | 1992 | CSF, PCR, BC        | 0.59 | 54.00  | 1.19 | 46,014,984.00 | 0.11735308 | 0.022      | 8 |
| Batuwanthudawe et al., 2010 | 2004      | 2004 | 0 | SEAR | Colombo, Sri Lanka              | 1 | 12  | 1 | 1   | 2008 | BC, CSF, LA         | 0.59 | 54.00  | 3.00 | 179,103.00    | 30.1502    | 0.05555556 | 9 |
| Jayaraman et al., 2018      | 2012-2013 | 2013 | 1 | SEAR | India                           | 1 | 12  | 2 | 2   | 2013 | LA, PCR, CSF, B, BC | 1.59 | 37.00  | NP   | 638,491.67    | 5.79490727 | NP         | 5 |
| Cho HK et al., 2010         | 1996-2005 | 2001 | 0 | WPR  | Korea                           | 2 | 120 | 2 | 2   | 2012 | LA, CSF, BC, B      | 0.59 | 63.00  | 0.00 | 10925119      | 0.58       | 0.00       | 6 |
| Greenhill et al., 2015      | 1996-2005 | 2001 | 0 | WPR  | Papua New Guinea                | 1 | 120 | 2 | 1   | 2008 | G, BC, CC, CSF, S   | 0.59 | 148.00 | NP   | 655,326.03    | 22.5841784 | NP         | 7 |



|                         |           |      |   |     |                           |   |     |   |   |      |                  |      |       |       |              |            |           |    |
|-------------------------|-----------|------|---|-----|---------------------------|---|-----|---|---|------|------------------|------|-------|-------|--------------|------------|-----------|----|
| Leung B et al., 2012    | 1995-2009 | 2002 | 0 | WPR | Auckland, New Zealand     | 2 | 180 | 1 | 2 | 1994 | CSF, BC, PCR     | 0.59 | 23.28 | NP    | 1,411,155.00 | 1.65       | NP        | 8  |
| Nakamura R et al., 2013 | 2008      | 2008 | 0 | WPR | Japan, Hokkaido           | 1 | 12  | 2 | 1 | 2011 | BC, CSF, PCR     | 1.59 | 12.00 | NP    | 206,910.00   | 5.8        | NP        | 5  |
| Nakamura R et al., 2013 | 2008      | 2008 | 0 | WPR | Japan, Okinawa            | 1 | 12  | 2 | 1 | 2011 | BC, CSF, PCR     | 1.59 | 3.97  | NP    | 81,246.74    | 4.89       | NP        | 5  |
| Nakamura R et al., 2013 | 2009      | 2009 | 0 | WPR | Japan, Hokkaido           | 1 | 12  | 2 | 1 | 2011 | BC, CSF, PCR     | 1.59 | 13.00 | NP    | 204,247.00   | 6.36       | NP        | 5  |
| Nakamura R et al., 2013 | 2009      | 2009 | 0 | WPR | Japan, Okinawa            | 1 | 12  | 2 | 1 | 2011 | BC, CSF, PCR     | 1.59 | 4.00  | NP    | 81,798.00    | 4.89       | NP        | 5  |
| Nakamura R et al., 2013 | 2010      | 2010 | 1 | WPR | Japan, Hokkaido           | 1 | 12  | 2 | 1 | 2011 | BC, CSF, PCR     | 1.59 | 12.00 | NP    | 203,366.00   | 5.9        | NP        | 5  |
| Nakamura R et al., 2013 | 2010      | 2010 | 1 | WPR | Japan, Okinawa            | 1 | 12  | 2 | 1 | 2011 | BC, CSF, PCR     | 1.59 | 7.00  | NP    | 82,353.00    | 8.5        | NP        | 5  |
| Nakamura R et al., 2013 | 2007-2011 | 2009 | 0 | WPR | Japan, Hokkaido           | 1 | 60  | 2 | 1 | 2011 | BC, CSF, PCR     | 1.59 | 11.31 | NP    | 203,366.00   | 5.56       | NP        | 5  |
| Nyambat B et al., 2011  | 2004-2005 | 2005 | 0 | WPR | Vietnam, Ho Chi Minh City | 2 | 24  | 2 | 1 | 2010 | CSF, BC          | 0.59 | 15.00 | 1.00  | 66,666.67    | 22.5       | 0.0666667 | 9  |
| Nyambat B et al., 2011  | 2004-2005 | 2005 | 0 | WPR | Vietnam, Hanoi            | 2 | 24  | 2 | 1 | 2010 | CSF, BC          | 0.59 | 10.00 | 0.00  | 102,040.82   | 9.8        | 0         | 9  |
| Scott S et al., 2013    | 2002-2004 | 2003 | 0 | WPR | Mongolia, Ulaanbaatar     | 1 | 36  | 2 | 1 | 2008 | CSF, PCR, LA, BC | 2.59 | 50.00 | 8.00  | 180,141.00   | 27.7560355 | 0.16      | 10 |
| Scott S et al., 2013    | 2005-2007 | 2006 | 0 | WPR | Mongolia, Ulaanbaatar     | 1 | 36  | 2 | 2 | 2008 | CSF, PCR, LA, BC | 2.59 | 8.00  | 1.00  | 180,141.00   | 4.44096569 | 0.125     | 10 |
| Scott S et al., 2013    | 2008-2010 | 2009 | 0 | WPR | Mongolia, Ulaanbaatar     | 1 | 36  | 2 | 2 | 2008 | CSF, PCR, LA, BC | 2.59 | 4.00  | 0.00  | 200,000.00   | 2          | 0         | 10 |
| Wu et al., 2019         | 2006-2013 | 2010 | 1 | WPR | China                     | 1 | 96  | 2 | 2 | N/A  | B, CSF, PCR      | 0.59 | 10.00 | NP    | 2,173,913.04 | 0.46       | NP        | 5  |
| Shinjo et al., 2012     | 2009-2010 | 2010 | 0 | WPR | Japan                     | 2 | 24  | 2 | 2 | 2011 | BC, PCR, CSF     | 1.59 | 85.00 | 15.30 | 1,164,383.56 | 7.3        | 0.18      | 6  |
| Shinjo et al., 2014     | 2011-2012 | 2012 | 1 | WPR | Japan                     | 2 | 24  | 2 | 2 | 2011 | CSF, PCR, BC     | 0.48 | 82.00 | NP    | 1,164,383.56 | 7.04235294 | NP        | 9  |

**Table S5: Quality Assessment Criteria**

| Quality Criteria |                                                                                                          | Assessment | Score | Maximum Score |
|------------------|----------------------------------------------------------------------------------------------------------|------------|-------|---------------|
| Study Design     | <i>Were the meningitis cases clearly defined: Clinical diagnosis and Laboratory confirmed diagnosis?</i> | Yes        | 1     | 3             |
|                  |                                                                                                          | No         | 0     |               |

|                                                             |                                                                                                                                |              |           |          |
|-------------------------------------------------------------|--------------------------------------------------------------------------------------------------------------------------------|--------------|-----------|----------|
|                                                             | <i>Were lumbar puncture/CSF consistently implemented across ALL study participants?</i>                                        | Yes          | 1         |          |
|                                                             |                                                                                                                                | Ambiguous    | 0         |          |
|                                                             | <i>Were inclusion and/or exclusion criteria for being in the study prespecified and applied uniformly to all participants?</i> | Yes          | 1         |          |
|                                                             |                                                                                                                                | No           | 0         |          |
| Were the limitations stated in the study?                   |                                                                                                                                | Yes          | 2         | <b>2</b> |
|                                                             |                                                                                                                                | Ambiguous    | 1         |          |
|                                                             |                                                                                                                                | No           | 0         |          |
| Sampling and Denominator                                    | Was the sampling technique defined ?                                                                                           | Yes          | 2         | <b>5</b> |
|                                                             |                                                                                                                                | Unclear      | 1         |          |
|                                                             |                                                                                                                                | No           | 0         |          |
|                                                             | Was the sample population given ?                                                                                              | Yes          | 1         |          |
|                                                             |                                                                                                                                | Extrapolated | 0         |          |
|                                                             | Was the sample appropriate for larger population ?                                                                             | Yes          | 2         |          |
|                                                             |                                                                                                                                | Unsure       | 1         |          |
| No                                                          |                                                                                                                                | 0            |           |          |
| <b>Total (High: 7-10, Moderate: 4-6 , Low Quality: 0-3)</b> |                                                                                                                                |              | <b>10</b> |          |

**Table S6: Median, Minimum, and Maximum values of Incidence and CFR by WHO region**

|                             | Number of Studies | Median Incident Rate (Per 100,000 child-years) | Interquartile Range (IQR) | Minimum     | Maximum      | Median Case-Fatality Rate | Interquartile Range | Minimum     | Maximum     |
|-----------------------------|-------------------|------------------------------------------------|---------------------------|-------------|--------------|---------------------------|---------------------|-------------|-------------|
| Africa (AFR)                | 9                 | 0.55                                           | 0.19-3.97                 | 0.02        | 28.29        | 0.14                      | 0.04-0.37           | 0.03        | 0.43        |
| AMR (AMR)                   | 3                 | 1.77                                           | 1.27-4.94                 | 0.42        | 10.43        | 0.06                      | 0.05-0.11           | 0.03        | 0.36        |
| Eastern Mediterranean (EMR) | 5                 | 0.61                                           | 0.22-1.03                 | 0.07        | 7.60         | 0.33                      | 0.30-0.37           | 0.27        | 0.40        |
| Europe (EUR)                | 5                 | 0.66                                           | 0.17-1.27                 | 0.02        | 6.64         | 0.04                      | 0.03-0.06           | 0.02        | 0.07        |
| South East Asia (SEAR)      | 2                 | 11.58                                          | 11.88-24.06               | 5.79        | 30.15        | *                         | *                   | *           | *           |
| Western Pacific (WPR)       | 9                 | 5.80                                           | 4.55-8.20                 | 0.46        | 27.76        | 0.14                      | 0.11-0.17           | 0.07        | 0.18        |
| <b>World</b>                | <b>33</b>         | <b>1.20</b>                                    | <b>0.30-5.56</b>          | <b>0.02</b> | <b>30.15</b> | <b>0.08</b>               | <b>0.06-0.19</b>    | <b>0.02</b> | <b>0.43</b> |

\*Not enough data for accurate calculation

**Figure S1: Funnel Plot Showing Distribution of Studies**

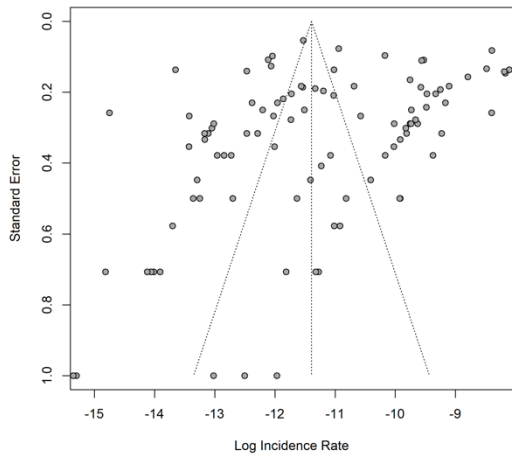

**Figure S2: Meta-analysis Results**

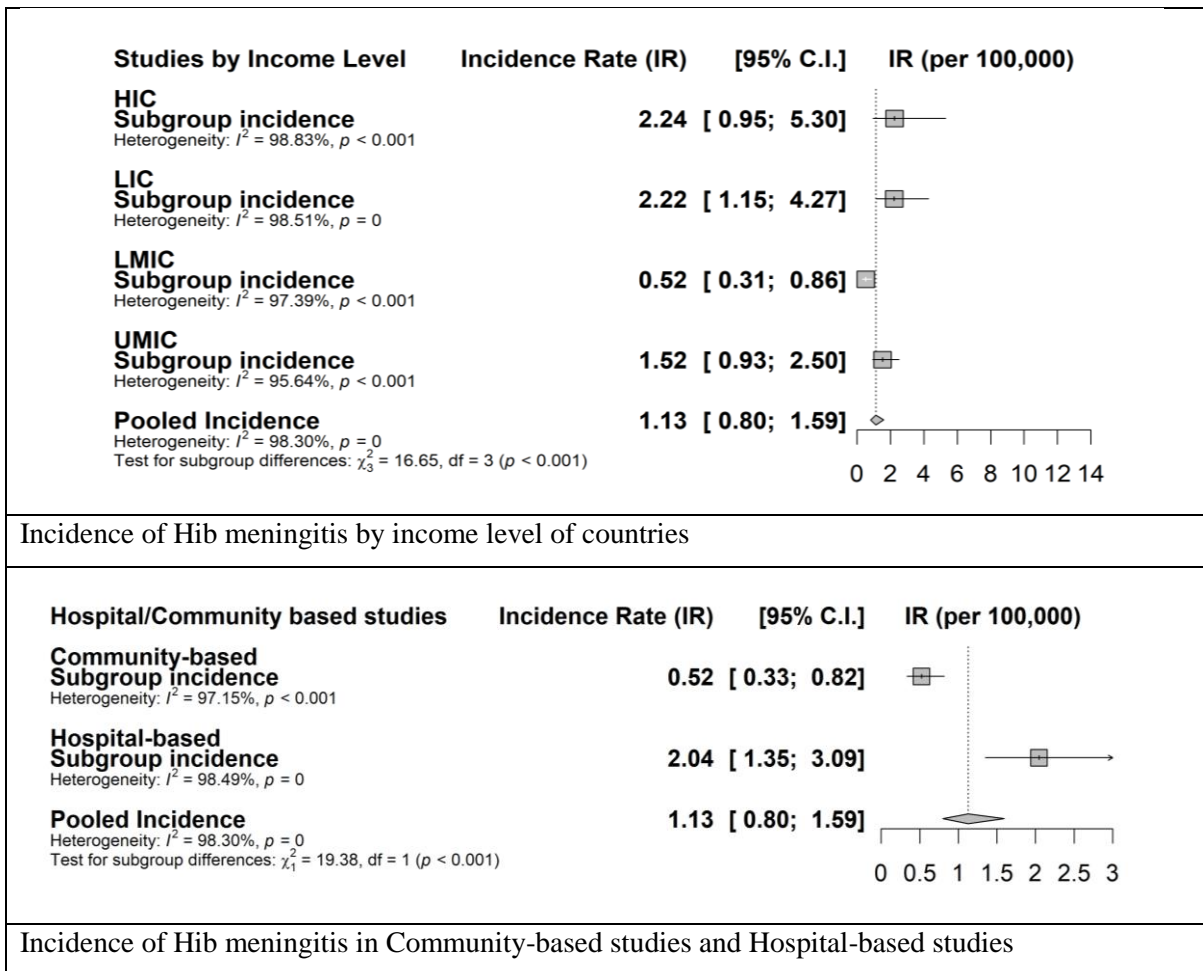

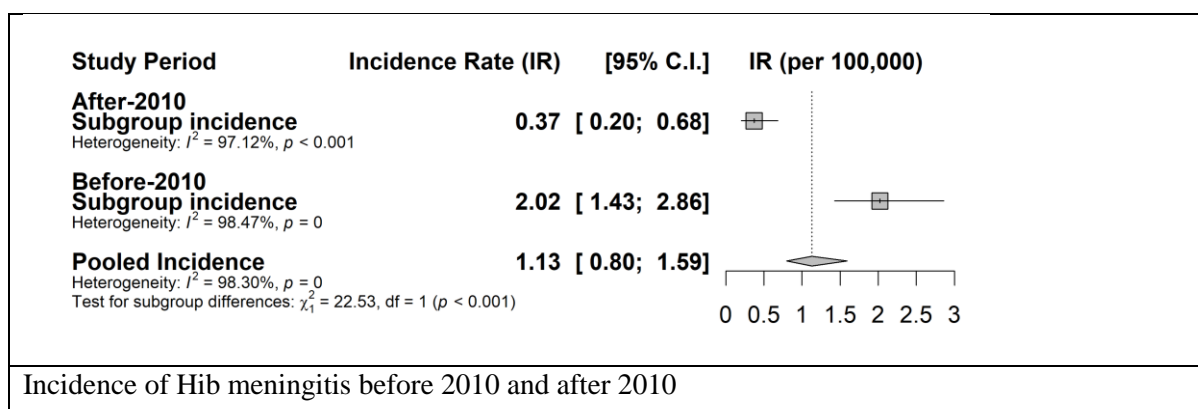

**Table S7: Vaccination Status of WHO Regions<sup>18</sup>**

|                             | Total Countries | Total Vaccination | % Vaccinated  | Non Vaccinated | % Non vaccinated | Pre 2010   | Since 2010 | % Pre 2010    | % Post 2010   |
|-----------------------------|-----------------|-------------------|---------------|----------------|------------------|------------|------------|---------------|---------------|
| Africa (AFR)                | 47              | 47                | 100.00%       | 0              | 0.00%            | 40         | 7          | 85.11%        | 14.89%        |
| AMR (AMR)                   | 54              | 35                | 64.81%        | 19             | 35.19%           | 33         | 1          | 94.29%        | 2.86%         |
| Eastern Mediterranean (EMR) | 23              | 21                | 91.30%        | 2              | 8.70%            | 16         | 5          | 76.19%        | 23.81%        |
| Europe (EUR)                | 53              | 53                | 100.00%       | 0              | 0.00%            | 45         | 7          | 84.91%        | 13.21%        |
| South East Asia (SEAR)      | 11              | 10                | 90.91%        | 1              | 9.09%            | 3          | 7          | 30.00%        | 70.00%        |
| Western Pacific (WPR)       | 37              | 26                | 70.27%        | 11             | 29.73%           | 19         | 8          | 73.08%        | 30.77%        |
| <b>Total</b>                | <b>225</b>      | <b>192</b>        | <b>85.33%</b> | <b>33</b>      | <b>14.67%</b>    | <b>156</b> | <b>35</b>  | <b>81.25%</b> | <b>18.23%</b> |

**Table S8: List of data sets with extrapolated population denominator**

| Author/Year of Publication | Study Period | Population Denominator |
|----------------------------|--------------|------------------------|
| Ceyhan M et al., 2014      | 2011-2012    | 4,422,449.67           |
| Greenhill et al., 2015     | 1996-2005    | 655,326.03             |
| Jayaraman et al., 2018     | 2012-2013    | 638,491.67             |
| Kaboré NF et al., 2012     | 2004-2005    | 166,109.81             |

|                                 |               |              |
|---------------------------------|---------------|--------------|
| Kaboré NF<br>et al., 2012       | 2006-<br>2008 | 280,515.46   |
| Khalifa AB<br>et al., 2011      | 1999-<br>2006 | 417,639.16   |
| Khowaja<br>AR et al.,<br>2013   | 2008-<br>2011 | 1,889,596.80 |
| Mwenda JM<br>et al., 2019       | 2011          | 4644803.678  |
| Mwenda JM<br>et al., 2019       | 2012          | 4703752.899  |
| Mwenda JM<br>et al., 2019       | 2013          | 4943658      |
| Mwenda JM<br>et al., 2019       | 2014          | 5106123.716  |
| Mwenda JM<br>et al., 2019       | 2015          | 5246857.624  |
| Mwenda JM<br>et al., 2019       | 2016          | 5400276.569  |
| Mwenda JM<br>et al., 2019       | 2011          | 2123693.9    |
| Mwenda JM<br>et al., 2019       | 2012          | 2198433.9    |
| Mwenda JM<br>et al., 2019       | 2013          | 2276620.2    |
| Mwenda JM<br>et al., 2019       | 2014          | 2358596      |
| Mwenda JM<br>et al., 2019       | 2015          | 2444355.3    |
| Mwenda JM<br>et al., 2019       | 2016          | 2533764.4    |
| Nakamura<br>R et al.,<br>2013   | 2008          | 81,246.74    |
| Schossler<br>JG et al.,<br>2013 | 1999-<br>2010 | 9,659,430.00 |
| Soeters HM<br>et al., 2019      | 2015-<br>2017 | 15692300.81  |

|                       |           |              |
|-----------------------|-----------|--------------|
| Teleb N et al., 2013  | 2005      | 2,551,775.74 |
| Teleb N et al., 2013  | 2006      | 2,603,062.53 |
| Teleb N et al., 2013  | 2007      | 2,655,787.68 |
| Teleb N et al., 2013  | 2008      | 2,709,742.60 |
| Teleb N et al., 2013  | 2009      | 2,677,680.63 |
| Teleb N et al., 2013  | 2010      | 2,727,923.77 |
| Wu et al., 2019       | 2006-2013 | 2,173,913.04 |
| Zaidi AK et al., 2010 | 2004-2005 | 2,333,333.33 |
